# Supplementary material for: Multimodal liquid chromatography of small molecules
Source: Royal Society of Chemistry journal article supplement (doi:10.1039/c3ay40302e), 2013-01-01
Supplement: c3ay40302e.pdf [file c3ay40302e.pdf]

**ESI Table 1:** Structures and peak labels of the imidazolium ionic liquids in **Figure 7**

| Compound                                  | Structure                                                                                                              | Anion                                                                                                                | <i>N</i> <sup>o</sup> |
|-------------------------------------------|------------------------------------------------------------------------------------------------------------------------|----------------------------------------------------------------------------------------------------------------------|-----------------------|
| Imidazole                                 |                                       | -                                                                                                                    | 0                     |
| [EtMeIm]Cl                                | EtMeIm <sup>+</sup><br>               | Cl <sup>-</sup>                                                                                                      | 1                     |
| [BuMeIm][Tf <sub>2</sub> N]               | BuMeIm <sup>+</sup><br>               | Tf <sub>2</sub> N <sup>-</sup><br> | 2                     |
| [BuMe <sub>2</sub> Im][Tf <sub>2</sub> N] | BuMe <sub>2</sub> Im <sup>+</sup><br> | Tf <sub>2</sub> N <sup>-</sup><br> | 3                     |
| [HexMeIm]Cl                               | HexMeIm <sup>+</sup><br>              | Cl <sup>-</sup>                                                                                                      | 4                     |
| [OctMeIm]Cl                               | OctMeIm <sup>+</sup><br>              | Cl <sup>-</sup>                                                                                                      | 5                     |

**ESI Table 2:** peak labels of the red wine anthocyanins in **Figure 10**

| Peak | Anthocyanin       |
|------|-------------------|
| 1    | Dp-3-gl           |
| 2    | Cy-3-gl           |
| 3    | Pt-3-gl           |
| 4    | Pe-3-gl           |
| 5    | Mv-3-gl           |
| 6    | Vi B              |
| 7    | Ac vi B           |
| 8    | Dp-3-acgl         |
| 9    | Cy-3-acgl         |
| 10   | Pt-3-acgl         |
| 11   | Pe-3-acgl         |
| 12   | Mv-3-acgl         |
| 13   | Coum vi B         |
| 14   | Vi A              |
| 15   | Mv-3-cis coumgl   |
| 16   | Ac vi A           |
| 17   | Dp-3-trans coumgl |
| 18   | Cy-3-trans coumgl |
| 19   | Mv-3-cafgl        |
| 20   | Pin A             |
| 21   | Pt-3-trans coumgl |
| 22   | Mv-3-gl-4-vp      |
| 23   | Pe-3-trans coumgl |
| 24   | Mv-3-trans coumgl |
| 25   | Ac pin A          |
| 26   | Mv-3-acgl-4-vp    |
| 27   | Coum vi A         |
